# Supplementary material for: A clinical-radiomics nomogram based on multisequence MRI for predicting intraoperative vertebral artery injury in patients with primary cervical spine tumor: a diagnostic study
Source: Research Square preprint supplement (doi:10.21203/rs.3.rs-7218476/v1), 2025-08-13
Supplement: Supplementary file 1 [file b1f76bdd854b7d9c8934cd62.docx]

**Table S1: Image acquisition parameters of Five MRI scanners.**

| Scanner Model | | General Electric  Signa 1.5T | Philips  Achieva 3.0T | Siemens  Avanto 1.5T | United Imaging uMR770 | GE premier 3.0T |
| --- | --- | --- | --- | --- | --- | --- |
| T2WI | Repetition time | 3500ms | 4500ms | 2500ms | 1800ms | 3200ms |
| Echo time | 101ms | 120ms | 94ms | 110.24ms | 120ms |
| Slice thickness | 4mm | 5mm | 6mm | 4mm | 4mm |
| Matrix | 320×224 | 352×160 | 512×512 | 256×256 | 360×288 |
| Field of view | 300×300mm2 | 200×300mm2 | 240×240mm2 | 200×300mm2 | 260×260mm2 |
| CET1 | Repetition time | 500ms | 650ms | 500ms | 698ms | 556 |
| Echo time | 14ms | 12ms | 14ms | 9.2ms | MinFull |
| Slice thickness | 5mm | 5mm | 3mm | 4mm | 4mm |
| Matrix | 512×512 | 352×160 | 512×512 | 240×216 | 360×240 |
| Field of view | 240×240mm2 | 380×380mm2 | 240×240mm2 | 200×300mm2 | 260×260mm2 |
